# Supplementary material for: Antibacterial activity and mechanism of sanguinarine against Providencia rettgeri in vitro
Source: PeerJ journal article supplement (doi:10.7717/peerj.9543), 2020-08-11

0MIC

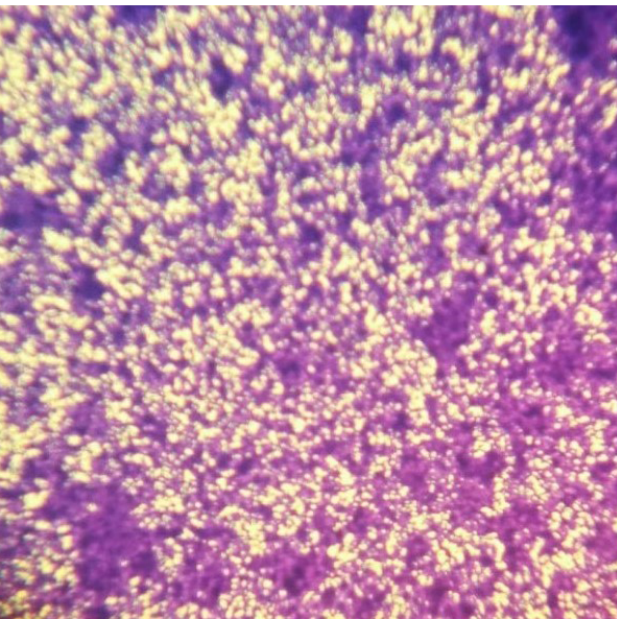

1/16MIC

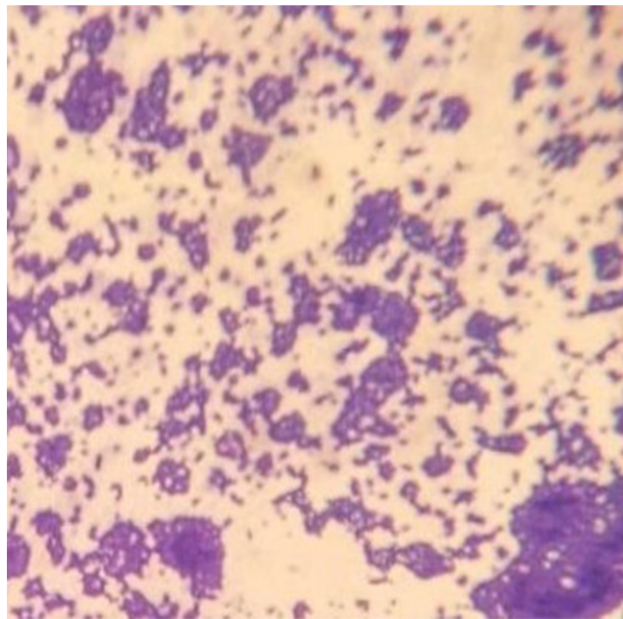

1/8MIC

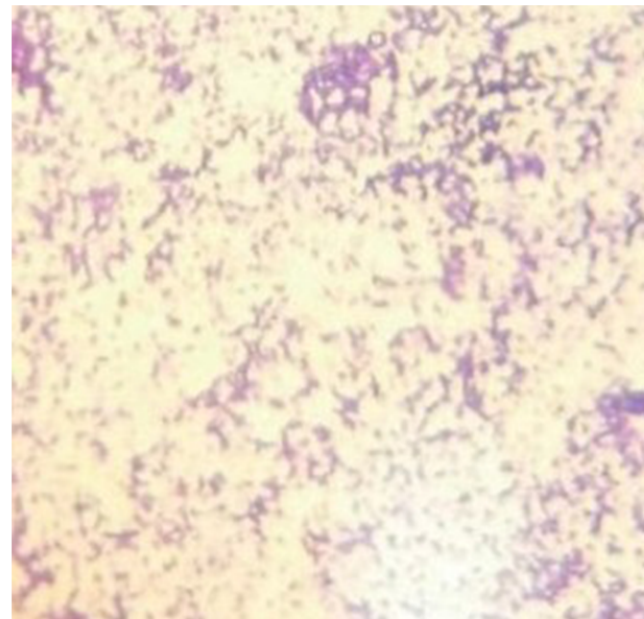

1/4MIC

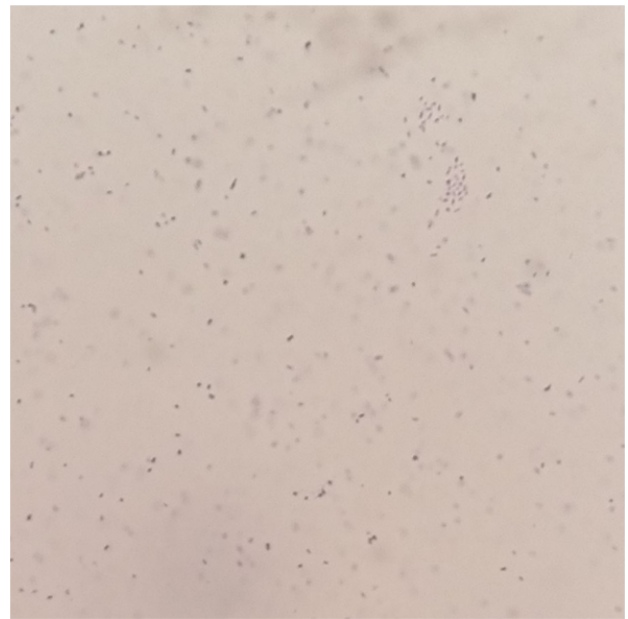

Supplement: supplement_figure.pdf [file supplement_figure.pdf]
